# Supplementary material for: The genomic footprint of social stratification in admixing American populations
Source: eLife journal article supplement (doi:10.7554/elife.84429), 2023-12-01

# Ancestry proportion inferred with RFMix

ACB

Aut

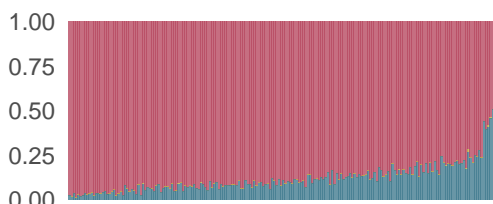

ACB

X

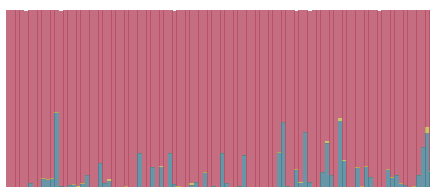

ASW

Aut

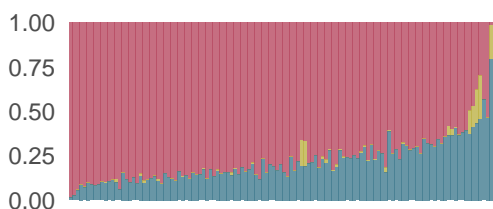

ASW

X

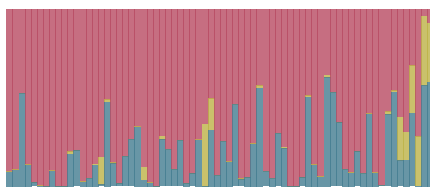

CLM

Aut

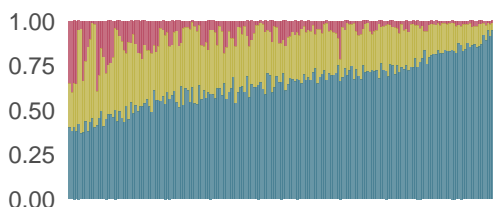

CLM

X

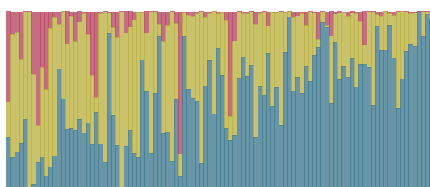

MXL

Aut

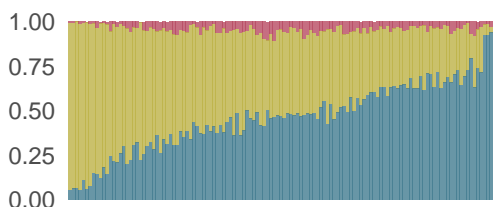

MXL

X

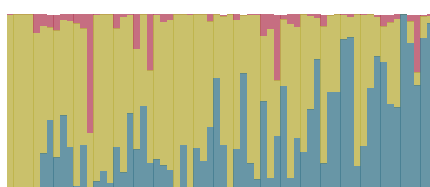

PEL

Aut

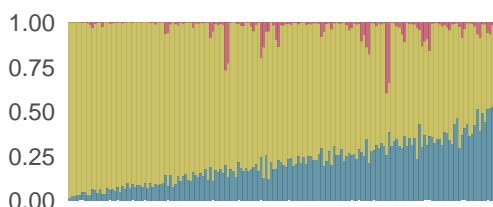

PEL

X

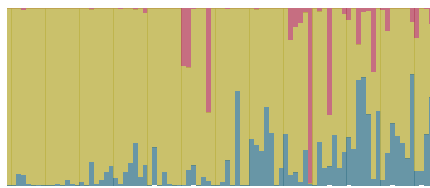

PUR

Aut

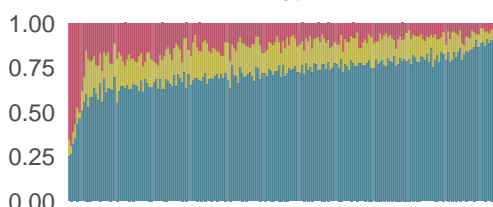

PUR

X

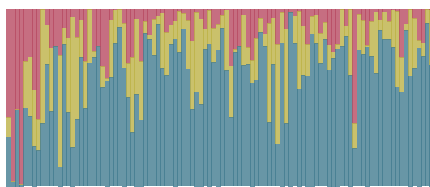

Supplement: supp [file elife-84429-supp-v1.zip]
