# Supplementary material for: The genomic footprint of social stratification in admixing American populations
Source: eLife journal article supplement (doi:10.7554/elife.84429), 2023-12-01

Predicted Gene Flow Rate in a second migration pulse 9 generations ago in simulated data with a single pulse and assortative mating in PUR

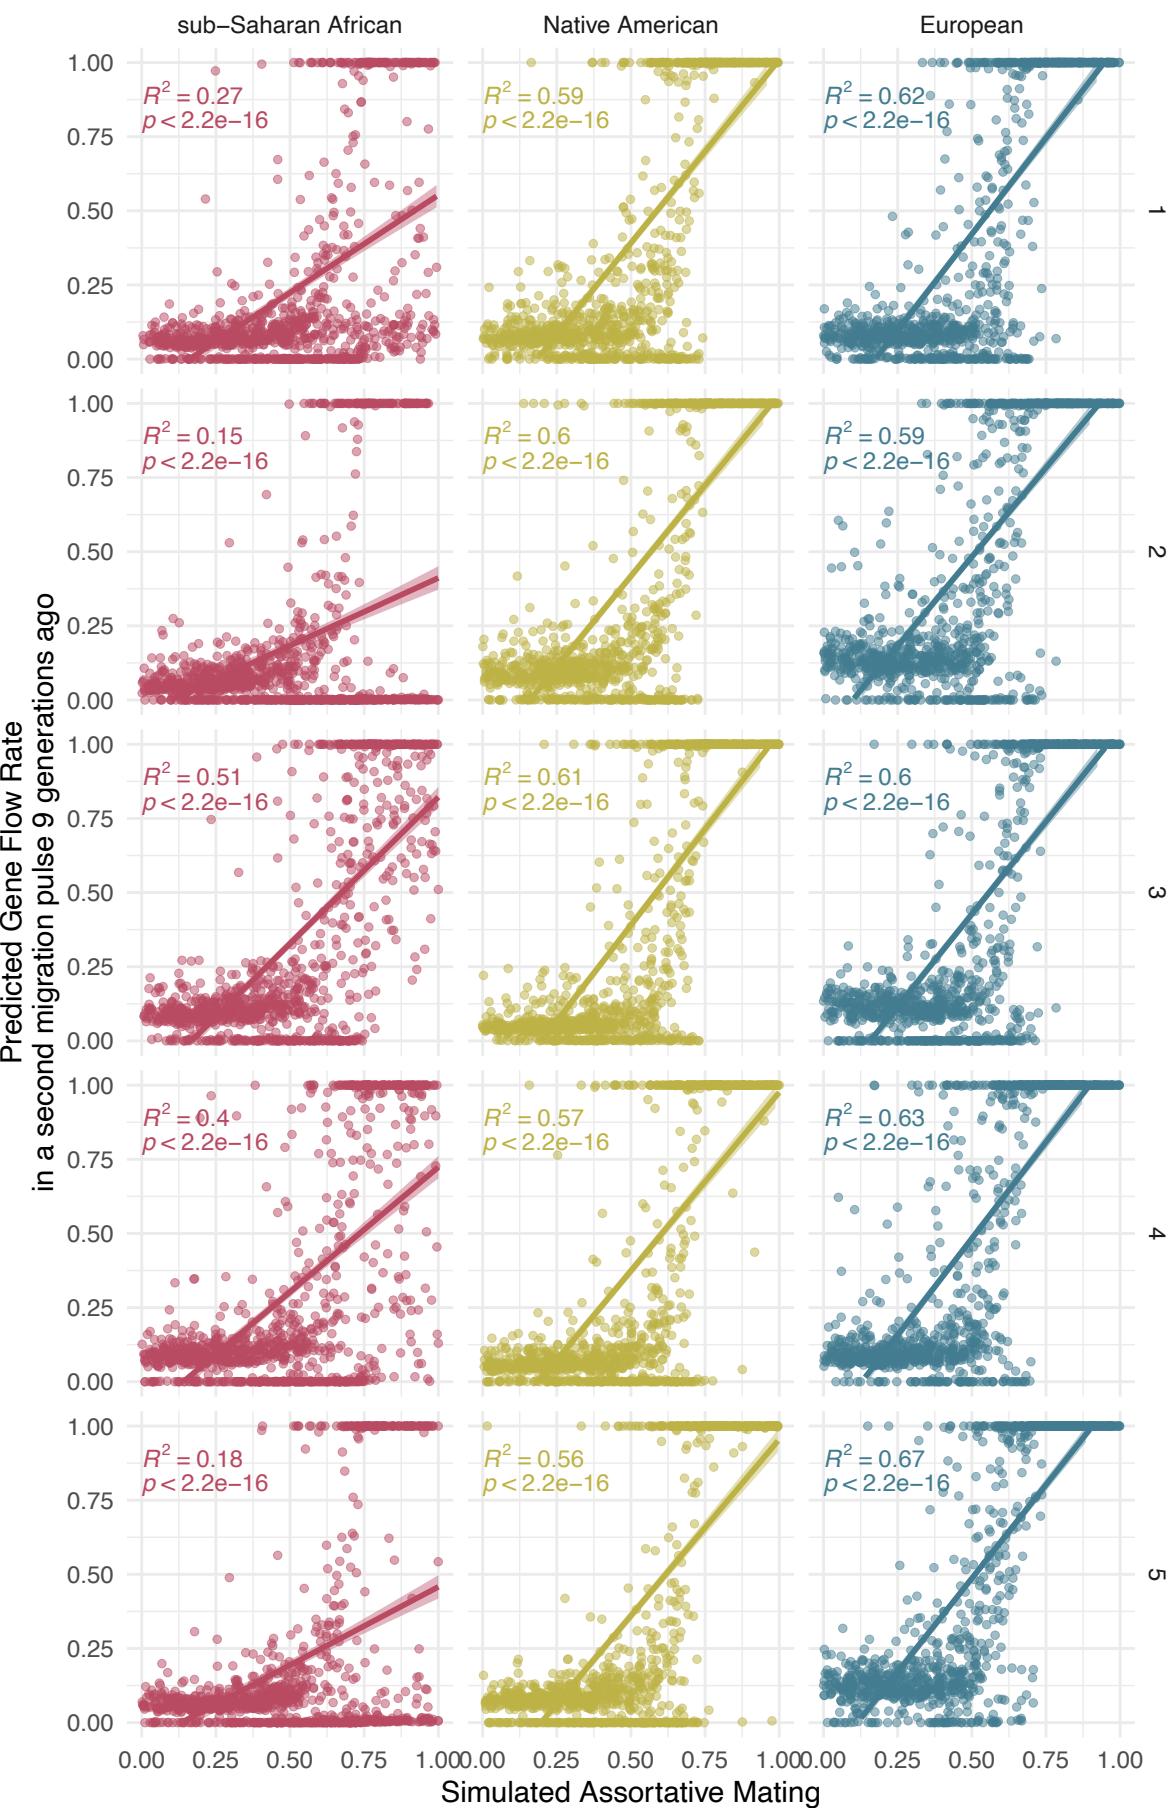

Supplement: supp [file elife-84429-supp-v1.zip]
