# Supplementary material for: The genomic footprint of social stratification in admixing American populations
Source: eLife journal article supplement (doi:10.7554/elife.84429), 2023-12-01
Supplement: supp [file elife-84429-supp-v1.zip]

Predicted Assortative Mating assuming one pulse  
in simulated data with two pulses and no assortative mating in PUR

Predicted Assortative Mating

sub-Saharan African

Native American

European

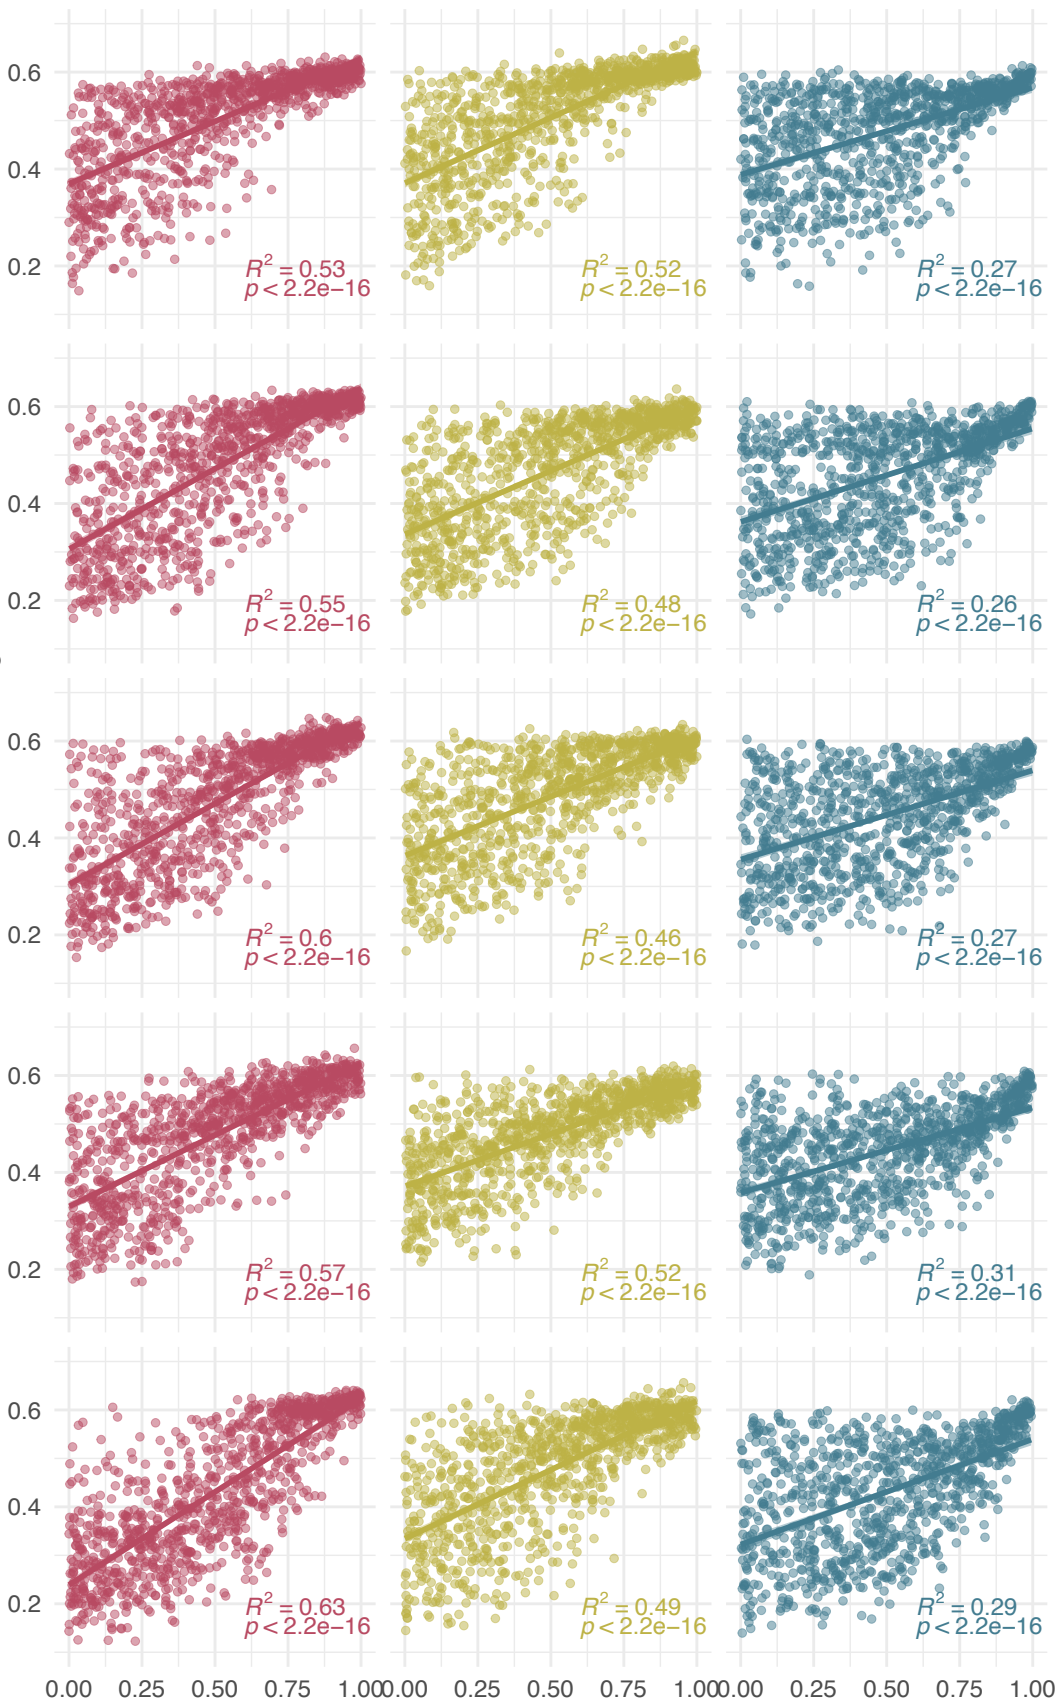

Simulated Gene Flow Rate  
in a second migration pulse 9 generations ago
