# Supplementary material for: The genomic footprint of social stratification in admixing American populations
Source: eLife journal article supplement (doi:10.7554/elife.84429), 2023-12-01

# Prediction of mating parameters in the One Pulse model from continuous ancestry tract lengths profile with Gnomix or RFMix for the local ancestry inference

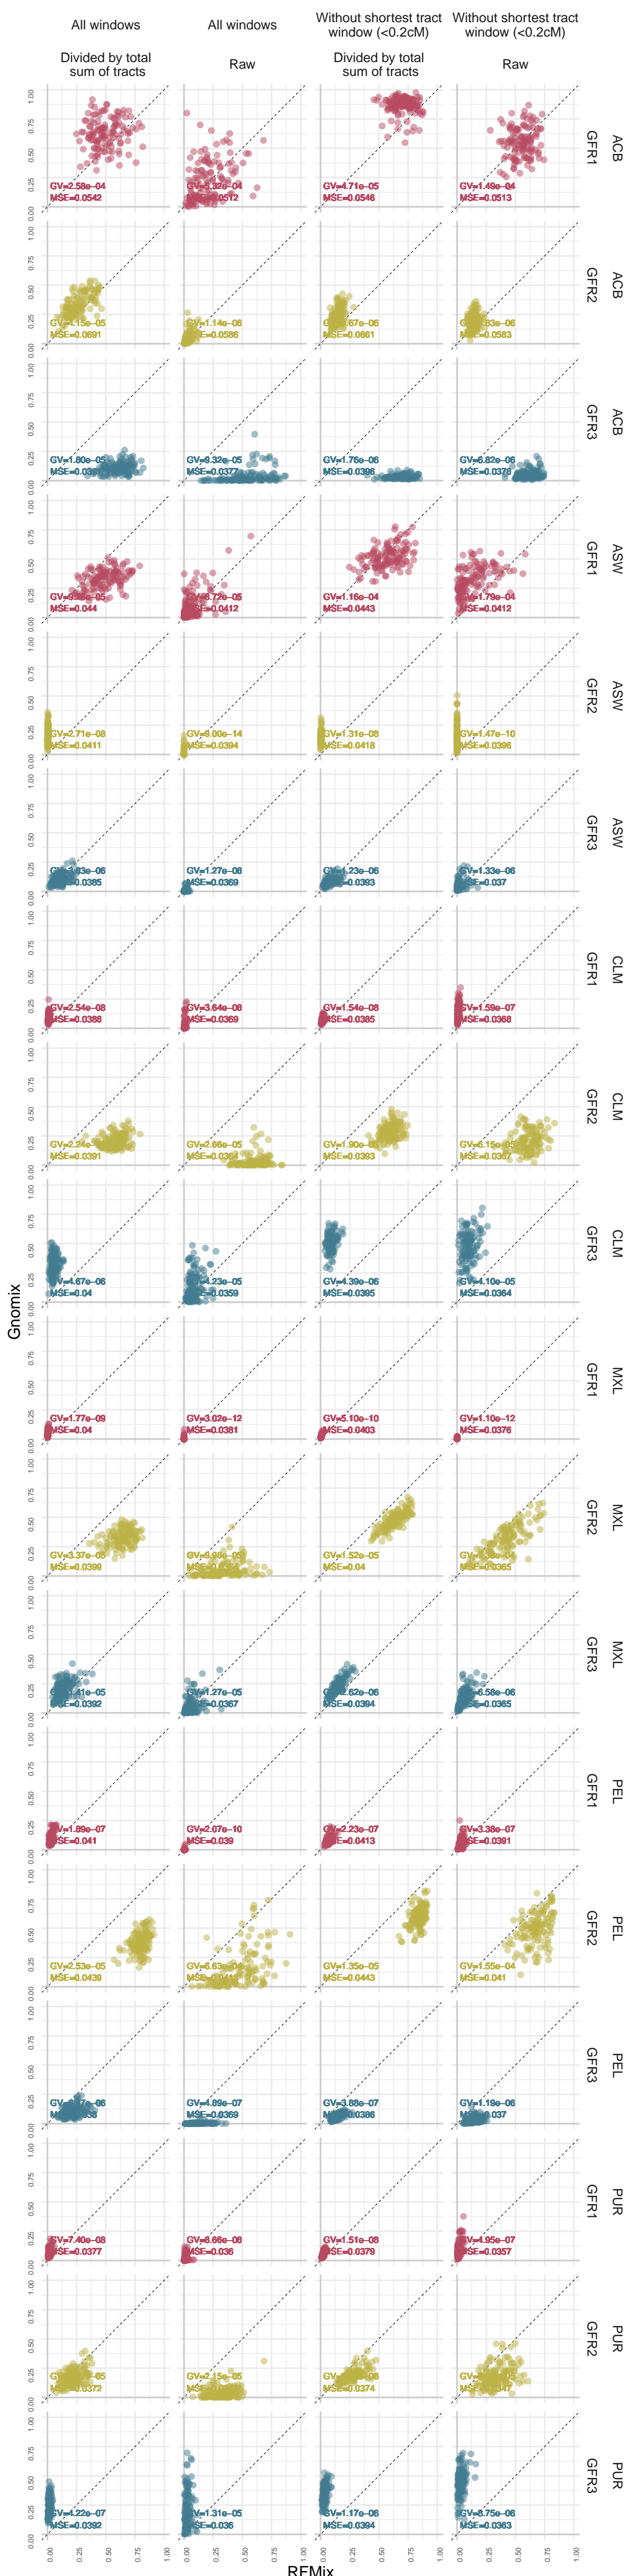

Supplement: supp [file elife-84429-supp-v1.zip]
