# Supplementary figures and images for: The genomic footprint of social stratification in admixing American populations
Source: eLife journal article supplement (doi:10.7554/elife.84429), 2023-12-01

ACB

ACB

X

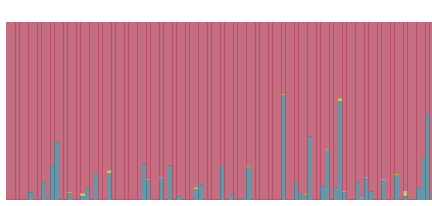

ASW

X

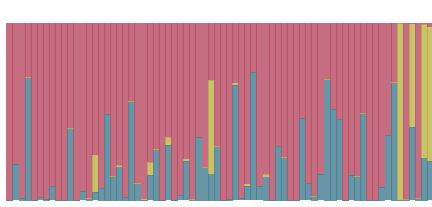

CLM

X

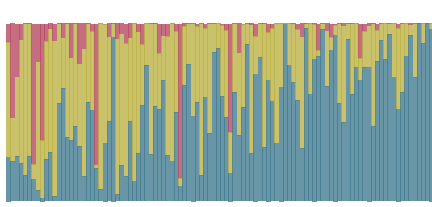

MXL

X

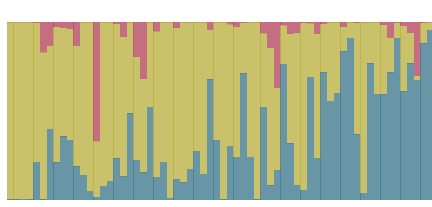

PEL

X

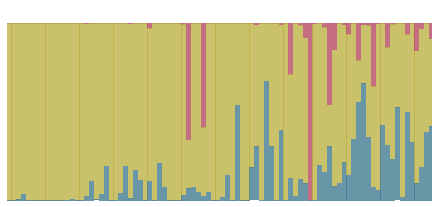

PUR

X

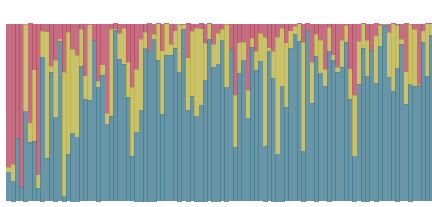

Supplement: supp [file elife-84429-supp-v1.zip]

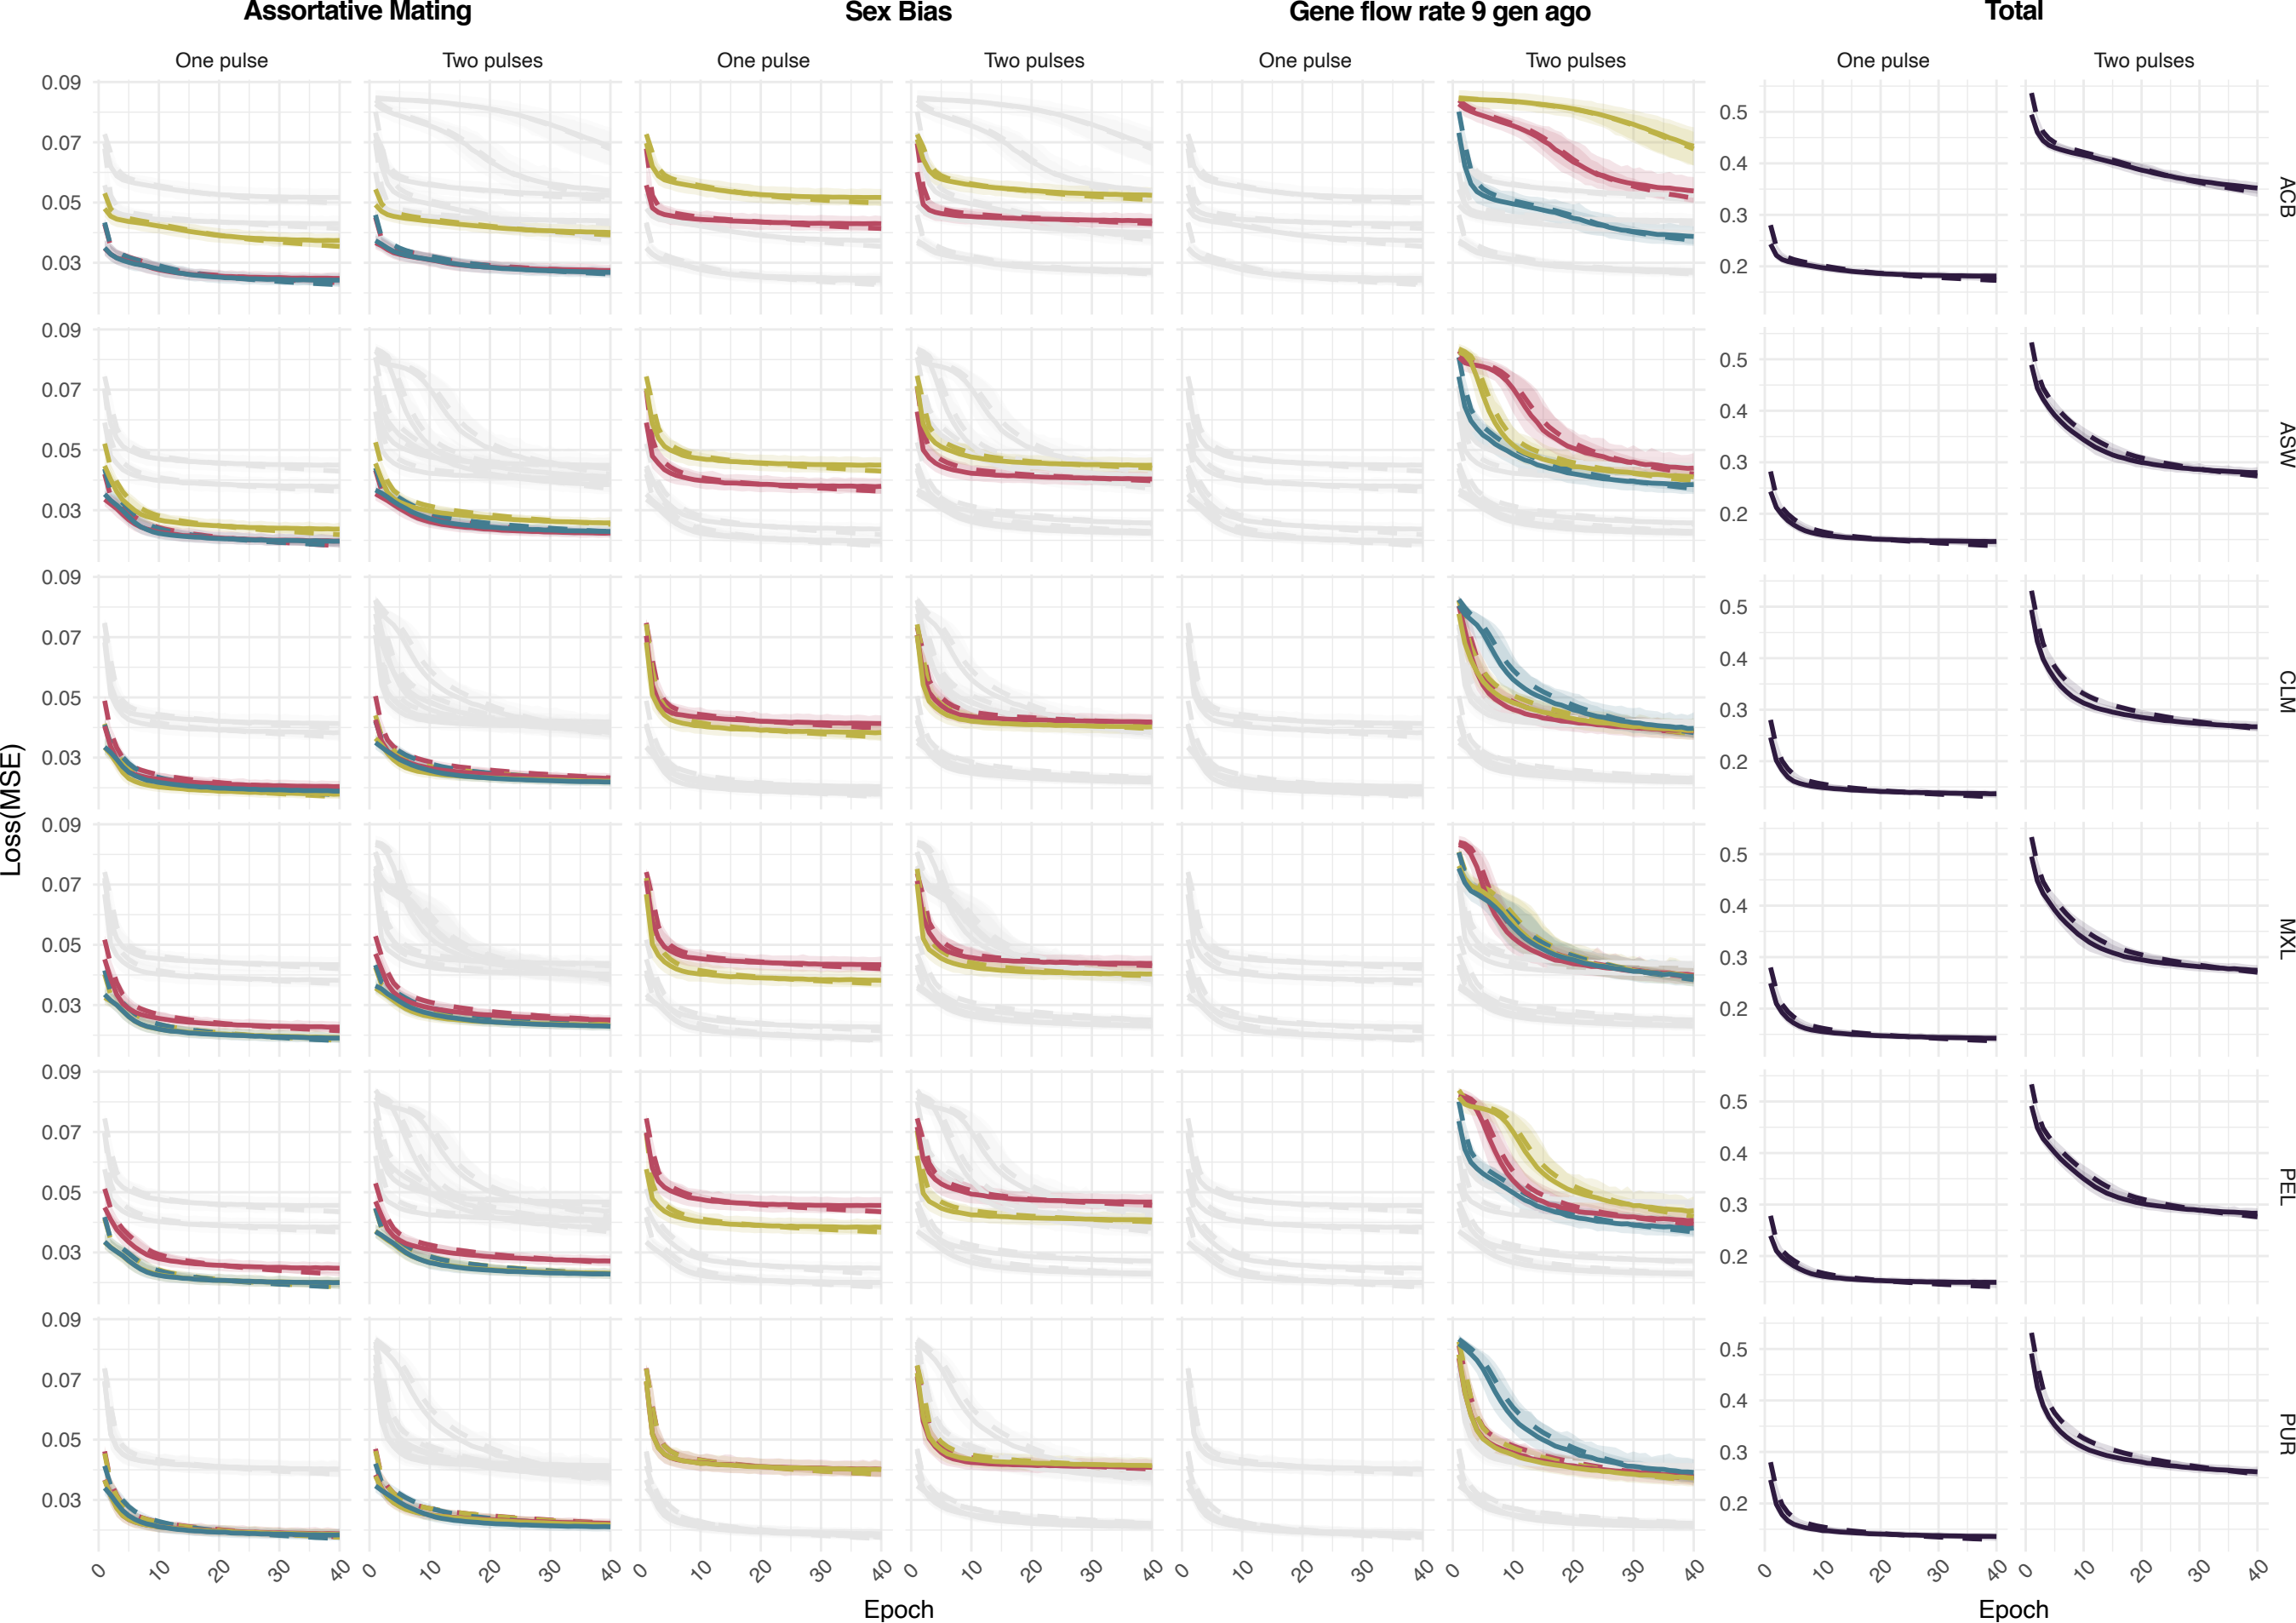

Supplement: supp [file elife-84429-supp-v1.zip]

# Continuous ancestry tract lengths profile

## Local ancestry inferred with RFMix

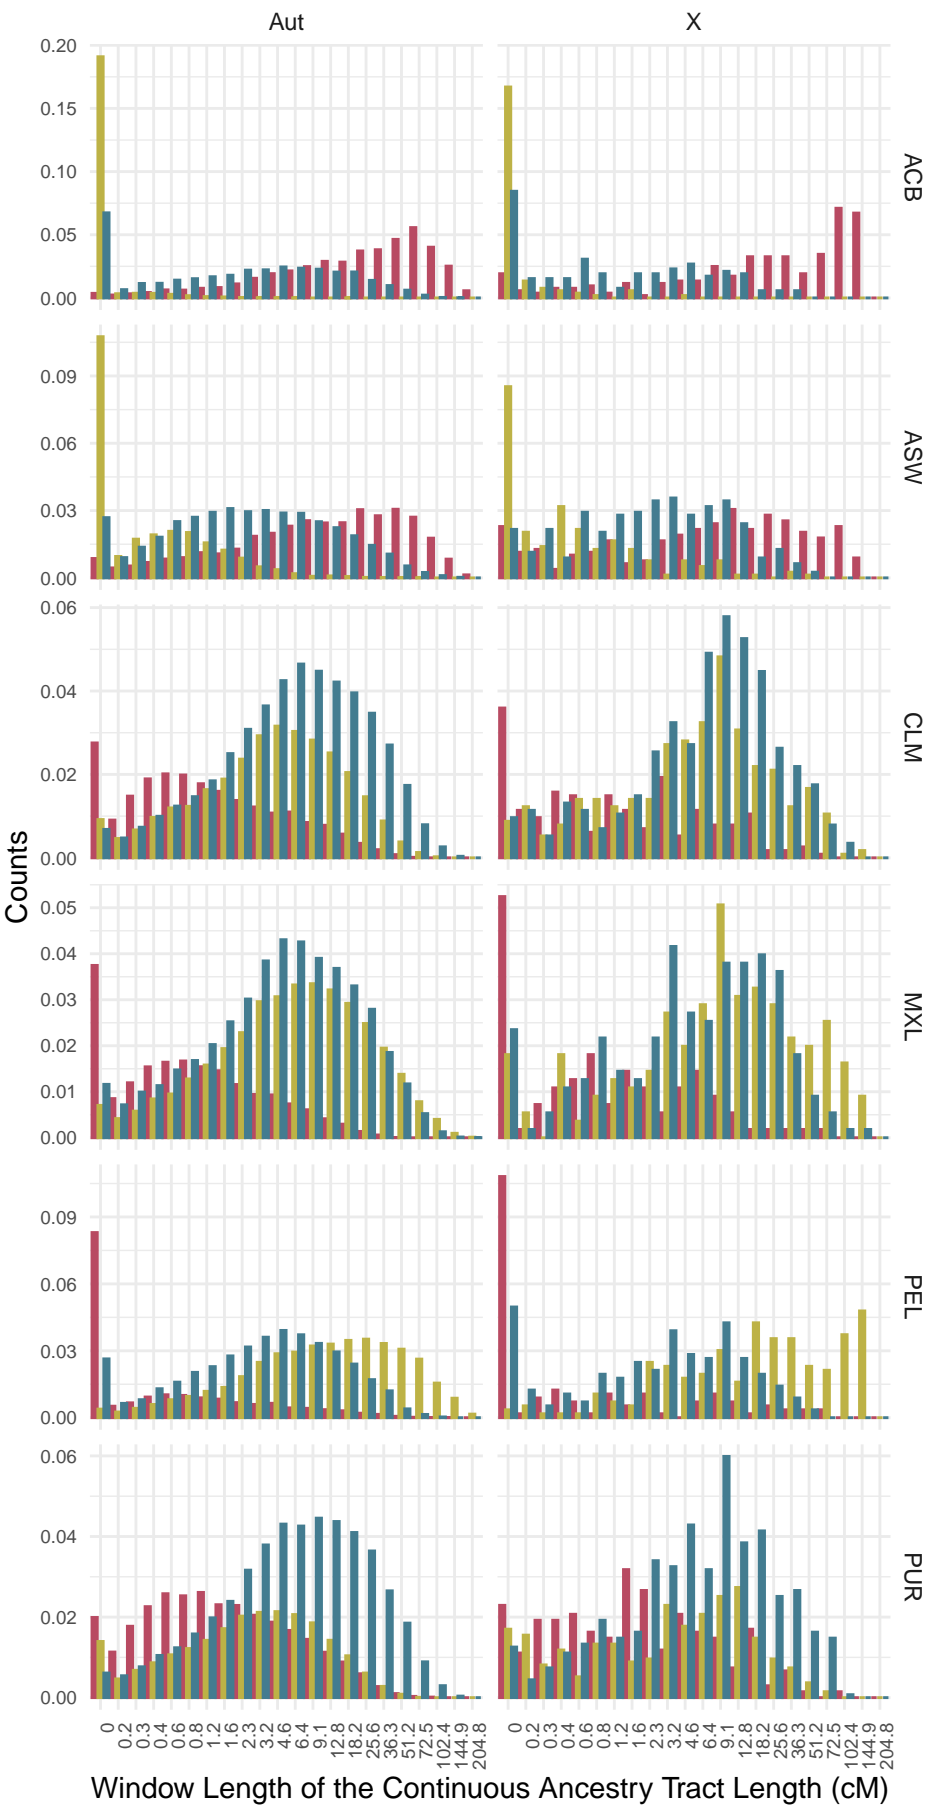

Supplement: supp [file elife-84429-supp-v1.zip]

# Continuous ancestry tract lengths profile

## Local ancestry inferred with Gnomix

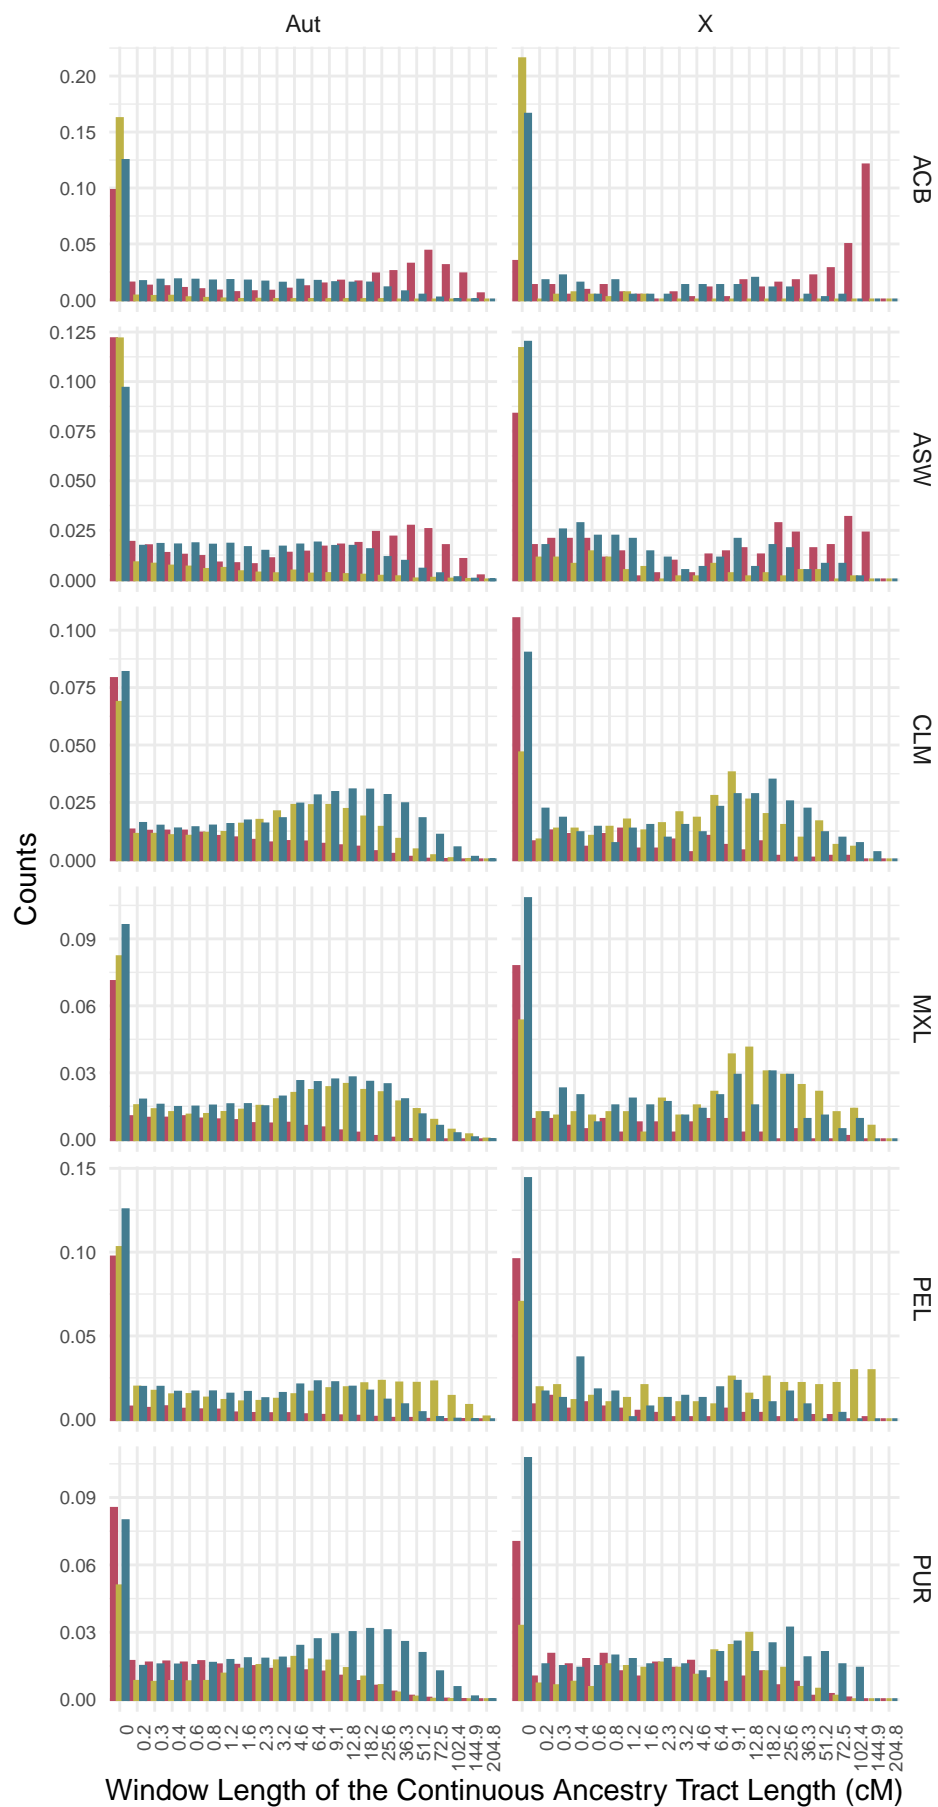

Supplement: supp [file elife-84429-supp-v1.zip]

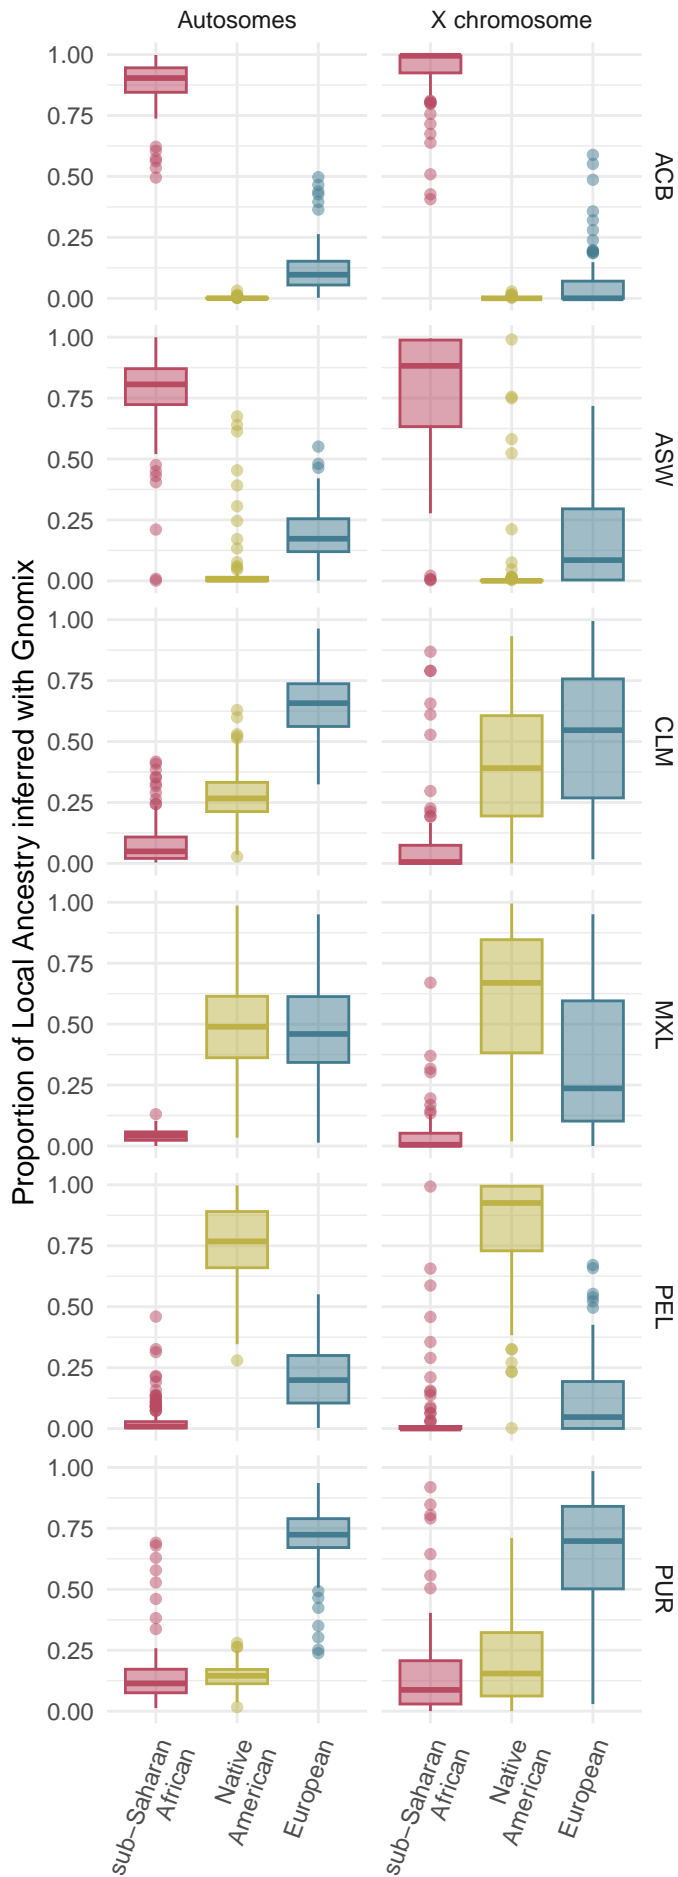

Supplement: supp [file elife-84429-supp-v1.zip]

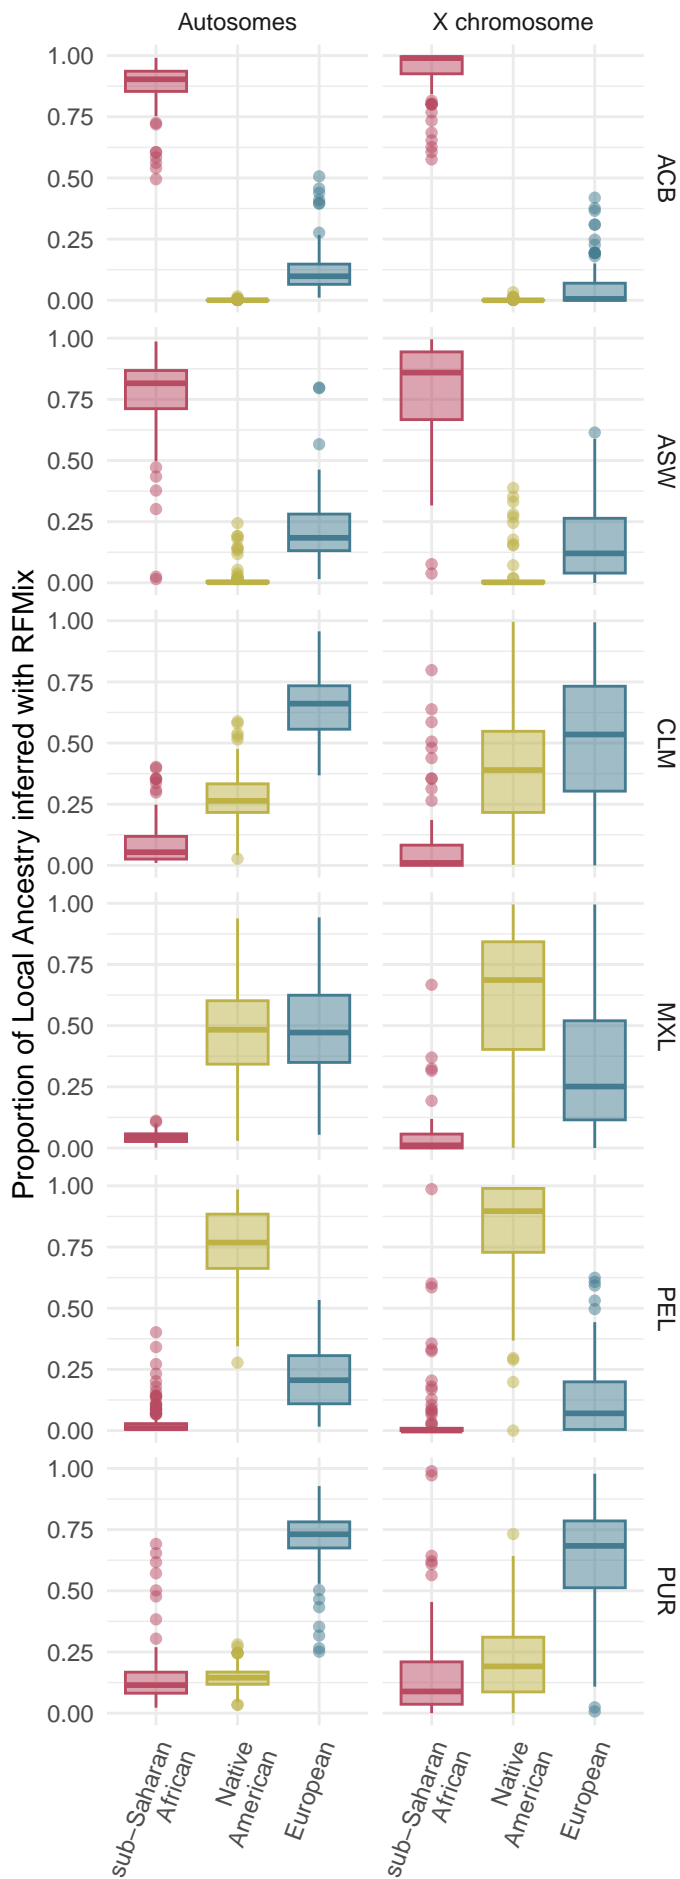

Supplement: supp [file elife-84429-supp-v1.zip]

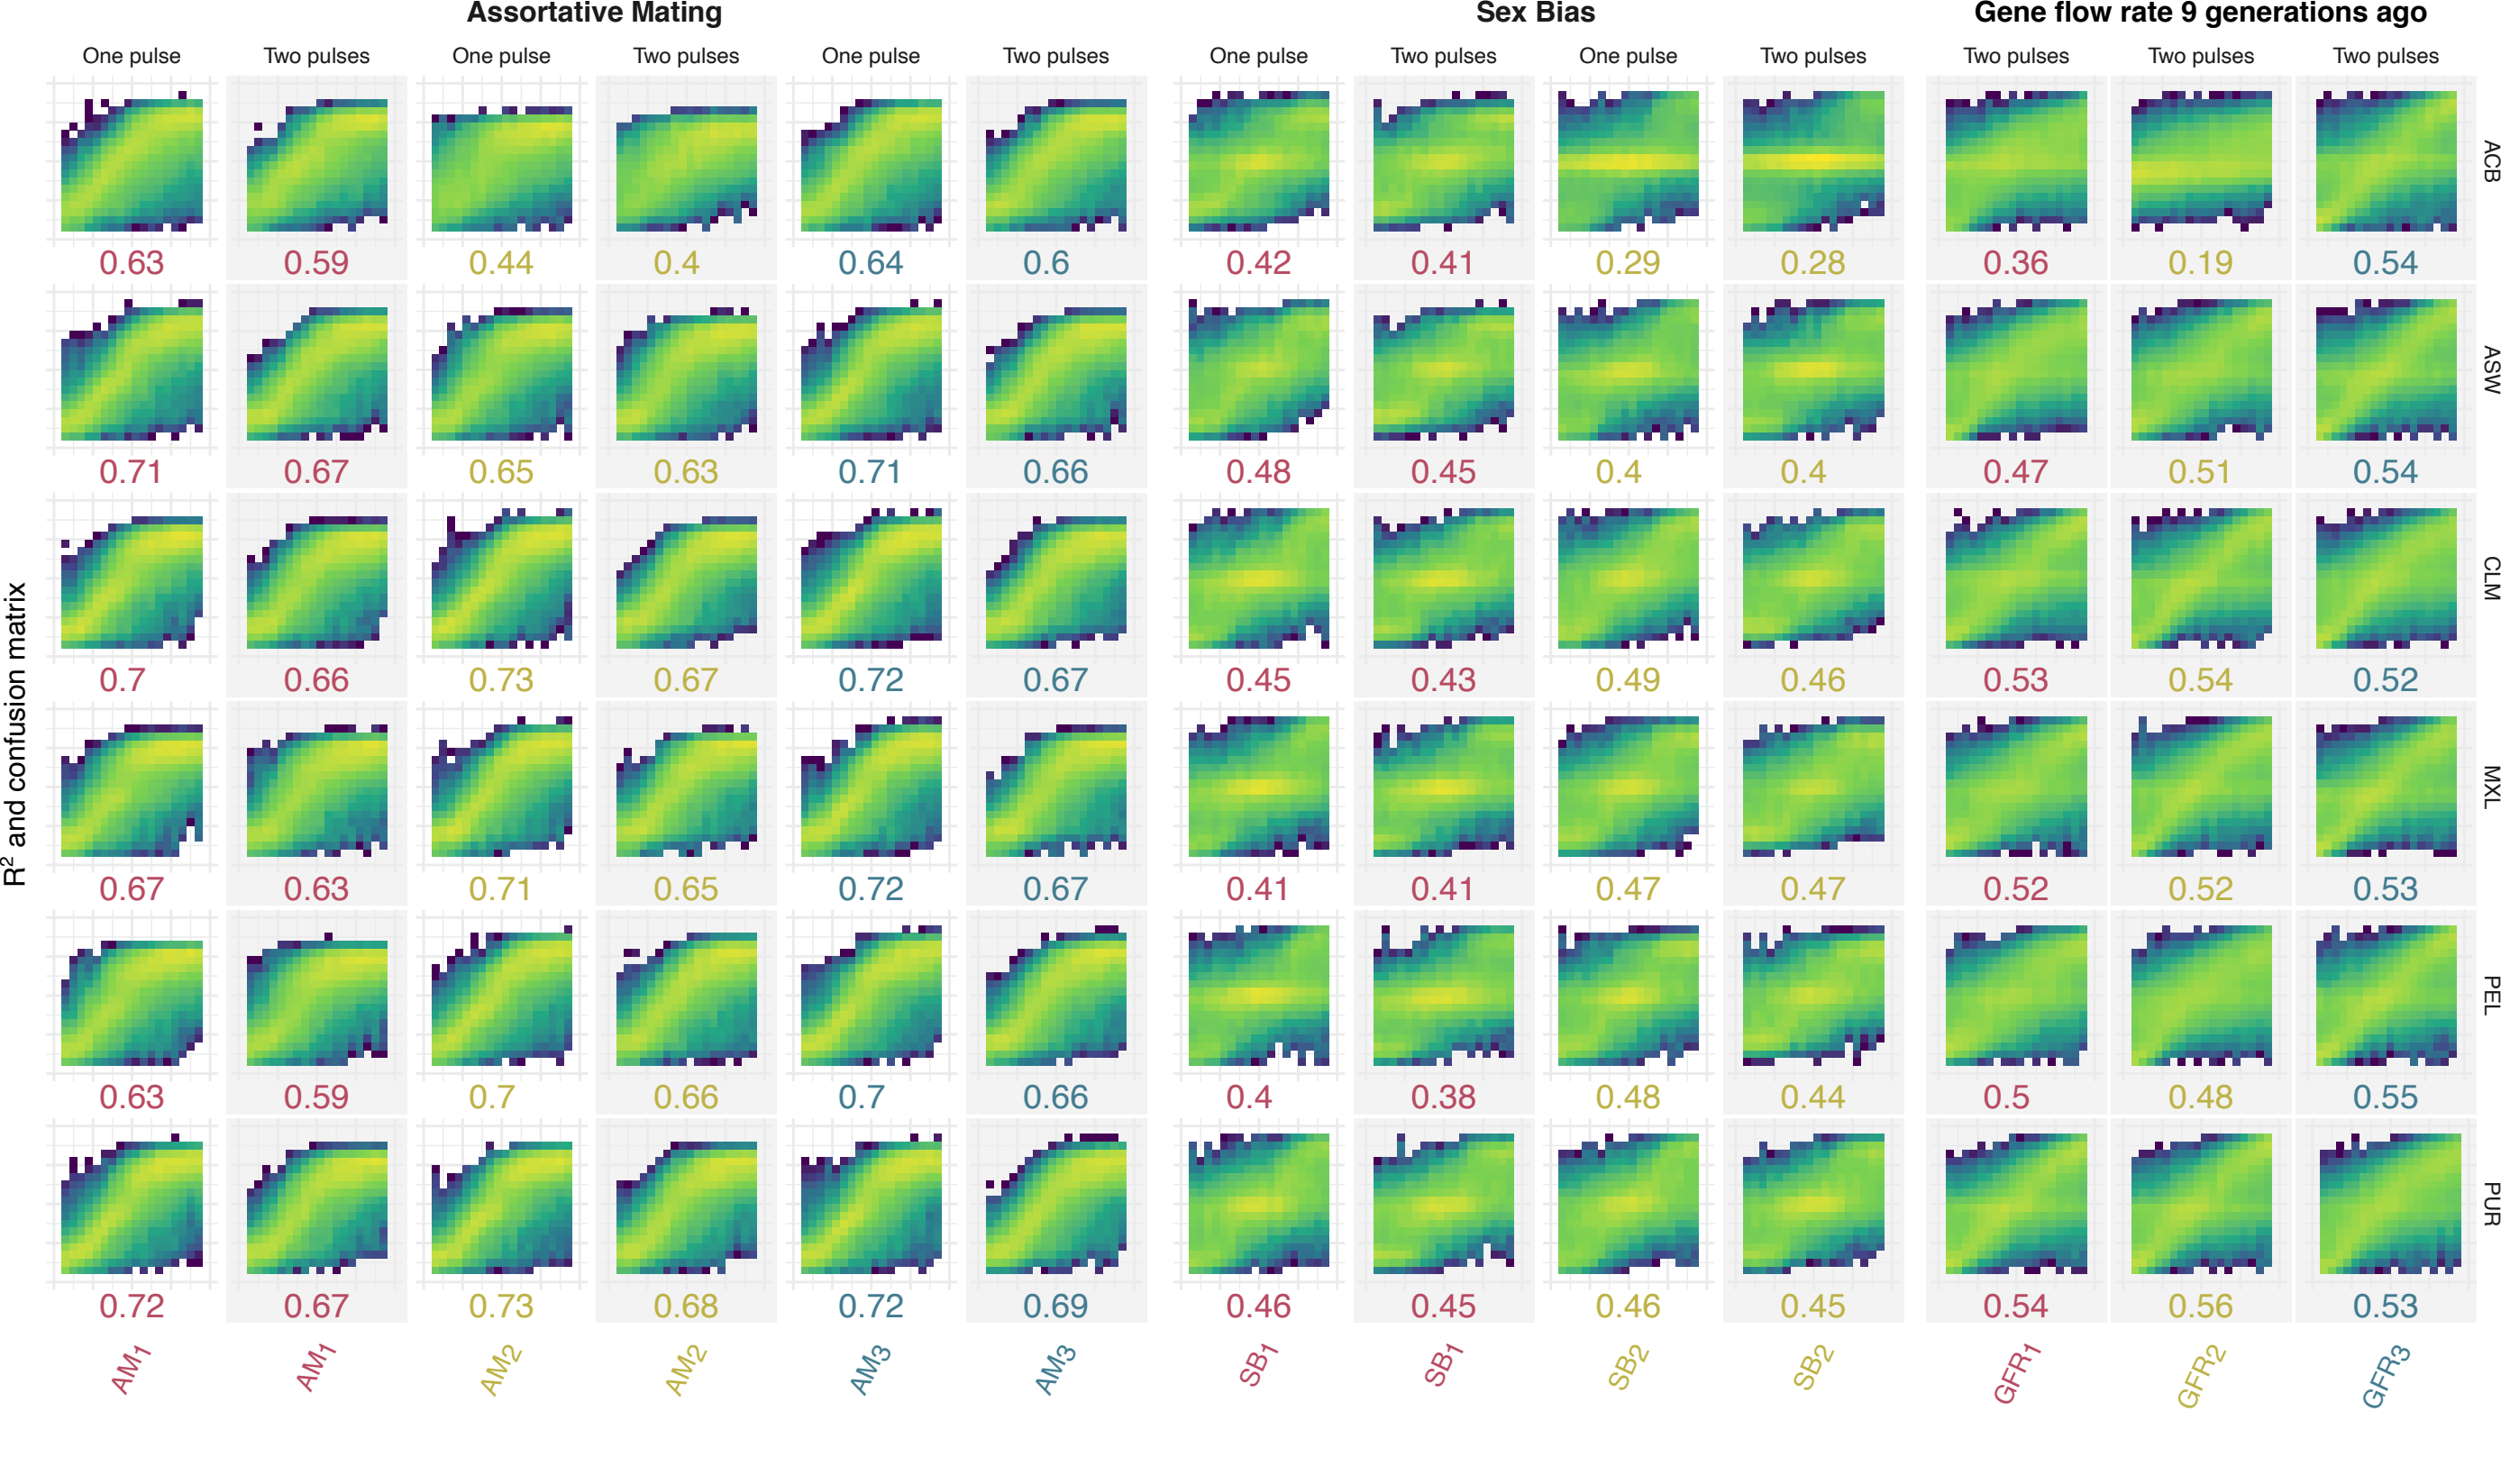

Supplement: supp [file elife-84429-supp-v1.zip]
